# Supplementary material for: Cost and low-carbon competitiveness of electrolytic hydrogen in China
Source: Royal Society of Chemistry journal article supplement (doi:10.1039/d1ee01840j), 2021-01-01
Supplement: d1ee01840j1.pdf [file d1ee01840j1.pdf]

# Supplementary Information

## Cost and Low-Carbon Competitiveness of Electrolytic Hydrogen in China

Guangsheng Pan, Wei Gu, Qinran Hu, Jianxiao Wang, Fei Teng, Goran Strbac

\*Correspondence to [wgu@seu.edu.cn](mailto:wgu@seu.edu.cn) (W.G.) and [g.strbac@imperial.ac.uk](mailto:g.strbac@imperial.ac.uk) (G.S.)

### Contents

|                                                                                 |           |
|---------------------------------------------------------------------------------|-----------|
| <b>S1 Optimization model data and parameters</b>                                | <b>S2</b> |
| <b>S2 Provincial LCOH falls by applying the time-of-use price</b>               | <b>S6</b> |
| <b>S3 Power purchased from the grid and PV output in Beijing within a week</b>  | <b>S7</b> |
| <b>S4 Annual bills paid by the provincial governments under three subsidies</b> | <b>S8</b> |

## S1 Optimization model data and parameters

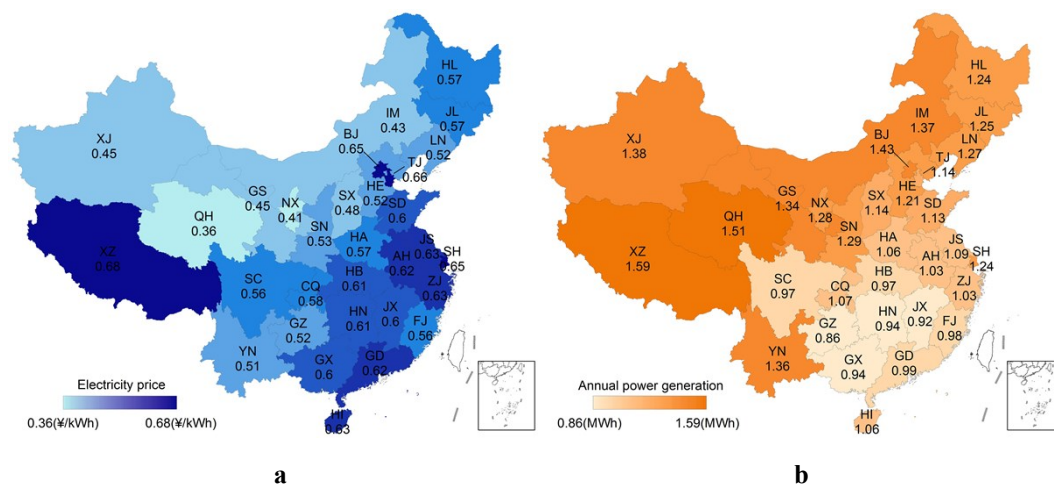

**Figure S1. Province-level differentiated grid electricity prices and photovoltaic output. a** Province-level electricity prices. **b** Annual power generation of a 1 kW solar panel in different provinces.

**Table S1** Electricity price data

| Province            | Electricity price(¥/kWh) | Basic electricity price   |                             |
|---------------------|--------------------------|---------------------------|-----------------------------|
|                     |                          | Active power (¥/kWh-year) | Apparent power (¥/kVA-year) |
| Beijing (BJ)        | 0.6470                   | 576                       | 384                         |
| Tianjin (TJ)        | 0.6580                   | 306                       | 204                         |
| Shanghai (SH)       | 0.6460                   | 504                       | 336                         |
| Chongqing (CQ)      | 0.5807                   | 432                       | 288                         |
| Liaoning (LN)       | 0.5156                   | 396                       | 264                         |
| Jilin (JL)          | 0.5716                   | 396                       | 264                         |
| Heilongjiang (HL)   | 0.5708                   | 396                       | 264                         |
| Inner Mongolia (IM) | 0.4328                   | 336                       | 228                         |
| Shanxi (SX)         | 0.4782                   | 432                       | 288                         |
| Hebei (HE)          | 0.5183                   | 420                       | 279.6                       |
| Shandong (SD)       | 0.6022                   | 456                       | 336                         |
| Shaanxi (SN)        | 0.5302                   | 372                       | 288                         |
| Ningxia (NX)        | 0.4110                   | 360                       | 240                         |
| Gansu (GS)          | 0.4532                   | 342                       | 228                         |
| Qinghai (QH)        | 0.3572                   | 342                       | 228                         |
| Xinjiang (XJ)       | 0.4508                   | 342                       | 228                         |
| Tibet (XZ)          | 0.6750                   | 342                       | 228                         |
| Sichuan (SC)        | 0.5574                   | 468                       | 312                         |
| Yunnan (YN)         | 0.5090                   | 444                       | 324                         |
| Guangxi (GX)        | 0.6011                   | 408                       | 330                         |
| Guizhou (GZ)        | 0.5217                   | 420                       | 312                         |
| Hunan (HN)          | 0.6147                   | 360                       | 240                         |
| Guangdong (GD)      | 0.6225                   | 384                       | 276                         |
| Fujian (FJ)         | 0.5602                   | 432                       | 288                         |
| Zhejiang (ZJ)       | 0.6344                   | 480                       | 360                         |
| Jiangxi (JX)        | 0.6043                   | 468                       | 312                         |
| Anhui (AH)          | 0.6192                   | 480                       | 360                         |
| Jiangsu (JS)        | 0.6268                   | 480                       | 360                         |

|             |        |     |     |
|-------------|--------|-----|-----|
| Hubei (HB)  | 0.6069 | 504 | 336 |
| Henan (HA)  | 0.5666 | 336 | 240 |
| Hainan (HI) | 0.6262 | 456 | 312 |

**Table S2** System Configurations and Technology Assumptions of a PGHS

| Parameter                                                                               | Value               |
|-----------------------------------------------------------------------------------------|---------------------|
| Photovoltaic (PV) investment cost (¥/kW)                                                | 5477.4 <sup>2</sup> |
| Fixed operation and maintenance (O&M) cost of PV(¥/kW-year)                             | 547.74              |
| Power to hydrogen (P2H, using PEM electrolyzer as a representative) capital cost (¥/kW) | 11665 <sup>3</sup>  |
| Fixed O&M and replacement cost of P2H (¥/kW-year)                                       | 647.4               |
| Lifetime (years)                                                                        | 20 <sup>3</sup>     |
| Conversion efficiency of P2H(using hydrogen low heating value)                          | 61.3 % <sup>3</sup> |
| Discount rate                                                                           | 3.85%               |

**Table S3** Share of renewable power generation in provincial power grids

| Province            | Share <sup>1</sup> |
|---------------------|--------------------|
| Beijing (BJ)        | 0.0406             |
| Tianjin (TJ)        | 0.0124             |
| Shanghai (SH)       | 0.0198             |
| Chongqing (CQ)      | 0.3559             |
| Liaoning (LN)       | 0.2297             |
| Jilin (JL)          | 0.1964             |
| Heilongjiang (HL)   | 0.1213             |
| Inner Mongolia (IM) | 0.1546             |
| Shanxi (SX)         | 0.0832             |
| Hebei (HE)          | 0.1180             |
| Shandong (SD)       | 0.0483             |
| Shaanxi (SN)        | 0.1257             |
| Ningxia (NX)        | 0.1713             |
| Gansu (GS)          | 0.4708             |
| Qinghai (QH)        | 0.7429             |
| Xinjiang (XJ)       | 0.2133             |
| Tibet (XZ)          | 0.9711             |
| Sichuan (SC)        | 0.8895             |
| Yunnan (YN)         | 0.9189             |
| Guangxi (GX)        | 0.5594             |
| Guizhou (GZ)        | 0.4026             |
| Hunan (HN)          | 0.4519             |
| Guangdong (GD)      | 0.2606             |
| Fujian (FJ)         | 0.4906             |
| Zhejiang (ZJ)       | 0.2287             |
| Jiangxi (JX)        | 0.1679             |
| Anhui (AH)          | 0.0561             |
| Jiangsu (JS)        | 0.0784             |
| Hubei (HB)          | 0.6010             |
| Henan (HA)          | 0.0599             |
| Hainan (HI)         | 0.3463             |

**Table S4** Assumptions of coal gasification (CG)<sup>4</sup>

| Years | Capital cost of CG (¥/kW <sub>h2</sub> ) | Annual O&M cost of CG (¥/kW <sub>h2</sub> -year) | Efficiency (LHV) | Emission factor (kgCO <sub>2</sub> /kgH <sub>2</sub> ) |
|-------|------------------------------------------|--------------------------------------------------|------------------|--------------------------------------------------------|
| 2020  | 18419                                    | 921                                              | 60 %             | 20.2                                                   |
| 2025  | 18419                                    | 921                                              | 60 %             | 20.2                                                   |
| 2030  | 18419                                    | 921                                              | 60 %             | 20.2                                                   |
| 2035  | 18419                                    | 921                                              | 60 %             | 20.2                                                   |
| 2040  | 18419                                    | 921                                              | 60 %             | 20.2                                                   |
| 2045  | 18419                                    | 921                                              | 60 %             | 20.2                                                   |
| 2050  | 18419                                    | 921                                              | 60 %             | 20.2                                                   |

**Table S5** Assumptions of coal gasification (CG) with CCUS<sup>4</sup>

| Years | Capital cost of CG (¥/kW <sub>h2</sub> ) | Annual O&M cost of CG (¥/kW <sub>h2</sub> -year) | Efficiency (LHV) | Emission factor (kgCO <sub>2</sub> /kgH <sub>2</sub> ) |
|-------|------------------------------------------|--------------------------------------------------|------------------|--------------------------------------------------------|
| 2020  | 19182                                    | 959                                              | 58 %             | 2.1                                                    |
| 2025  | 19182                                    | 959                                              | 58 %             | 2.1                                                    |
| 2030  | 19182                                    | 959                                              | 58 %             | 2.1                                                    |
| 2035  | 19182                                    | 959                                              | 58 %             | 2.1                                                    |
| 2040  | 19182                                    | 959                                              | 58 %             | 2.1                                                    |
| 2045  | 19182                                    | 959                                              | 58 %             | 2.1                                                    |
| 2050  | 19182                                    | 959                                              | 58 %             | 2.1                                                    |

**Table S6** Current and forecast price and technology levels of three electrolyzers<sup>5</sup>

| Type         | Current investment price (¥/kW) | 2050 investment price (¥/kW) | Current Efficiency (LHV*) | Efficiency in 2050 (LHV*) |
|--------------|---------------------------------|------------------------------|---------------------------|---------------------------|
| PEM          | 4830-12000                      | <1380                        | 50-83 kWh/kg              | <45 kWh/kg                |
| Alkaline     | 3450-6900                       | <1380                        | 50-78 kWh/kg              | <45 kWh/kg                |
| Solid oxide* | >13800                          | <2070                        | 40-50 kWh/kg              | <40 kWh/kg                |

\* Low heating value (LHV) of hydrogen is 33.3 kWh/kg

\* The heat for water vaporization in solid oxide electrolyzers comes from the input power.

**Table S7** Data and parameters for fossil fuel substitution by hydrogen in industry

| Province | Product        | Hydrogen consumption for producing per kg of product (kg) <sup>6, 7</sup> | Substitution percentage <sup>8</sup> | Annual production (10 <sup>6</sup> ton) |
|----------|----------------|---------------------------------------------------------------------------|--------------------------------------|-----------------------------------------|
| Jiangsu  | Ammonia        | 0.123                                                                     | 30 %                                 | 3.07                                    |
|          | Iron and steel | 0.036                                                                     | 10 %                                 | 104.26                                  |
| Yunnan   | Ammonia        | 0.123                                                                     | 30 %                                 | 2.1                                     |
|          | Iron and steel | 0.036                                                                     | 10 %                                 | 19.25                                   |

**Table S8** Assumptions of CO<sub>2</sub> price and Coal price

| Years | Low CO <sub>2</sub> price (¥/ton)* | High CO <sub>2</sub> price (¥/ton)* | Coal price (¥/ton) |
|-------|------------------------------------|-------------------------------------|--------------------|
| 2020  | 15                                 | 60                                  | 592 <sup>10</sup>  |

|      |       |     |                   |
|------|-------|-----|-------------------|
| 2025 | 37.5  | 150 | 655 <sup>11</sup> |
| 2030 | 60    | 240 | 681               |
| 2035 | 82.5  | 330 | 706               |
| 2040 | 105   | 420 | 731               |
| 2045 | 127.5 | 510 | 757               |
| 2050 | 150   | 600 | 782               |

\* Low CO<sub>2</sub> price is set at half of the predicted value of the State Grid Energy Research Institution<sup>9</sup>.

\* High CO<sub>2</sub> price is set twice the value predicted by the State Grid Energy Research Institution<sup>9</sup>.

**Table S9** Drops of Per capita CO<sub>2</sub> emissions compared with 2005<sup>9</sup>

| Years | Drops of Per capita CO <sub>2</sub> emissions compared with 2005 (%) |
|-------|----------------------------------------------------------------------|
| 2020  | 50                                                                   |
| 2025  | 60                                                                   |
| 2030  | 70                                                                   |
| 2035  | 75                                                                   |
| 2040  | 80                                                                   |
| 2045  | 85                                                                   |
| 2050  | 90                                                                   |

**Table S10** Assumptions of PV and P2H

| Years | Capital cost of PV (¥/kW) | Capital cost of P2H (¥/kW) | P2H Efficiency (LHV*) |
|-------|---------------------------|----------------------------|-----------------------|
| 2020  | 5477 <sup>2</sup>         | 11665 <sup>3</sup>         | 61.3% <sup>3</sup>    |
| 2025  | 4400                      | 8278                       | 64%                   |
| 2030  | 3350                      | 6209 <sup>12</sup>         | 69% <sup>7</sup>      |
| 2035  | 2300 <sup>9</sup>         | 5002                       | 71.5%                 |
| 2040  | 2166                      | 3795                       | 74% <sup>7</sup>      |
| 2045  | 2033                      | 2588                       | 78.5%                 |
| 2050  | 1900 <sup>9</sup>         | 1380 <sup>8</sup>          | 83% <sup>8</sup>      |

\* Low heating value (LHV) of hydrogen is 33.3 kWh/kg

**Table S11** Assumptions of share of renewable power generation nationwide

| Years | Share                |
|-------|----------------------|
| 2020  | 27.9 % <sup>13</sup> |
| 2025  | 40 %                 |
| 2030  | 50 % <sup>14</sup>   |
| 2035  | 57.5 %               |
| 2040  | 65 %                 |
| 2045  | 72.5 %               |
| 2050  | 80 %                 |

## S2 Provincial LCOH falls by applying the time-of-use price

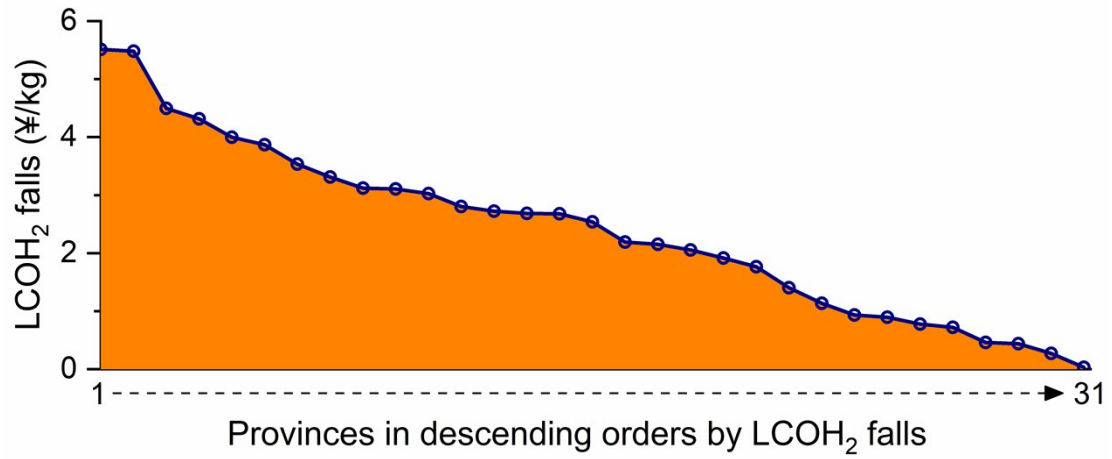

**Figure S2.** Provincial LCOH falls by applying the time-of-use price.

### S3 Power purchased from the grid and PV output in Beijing within a week

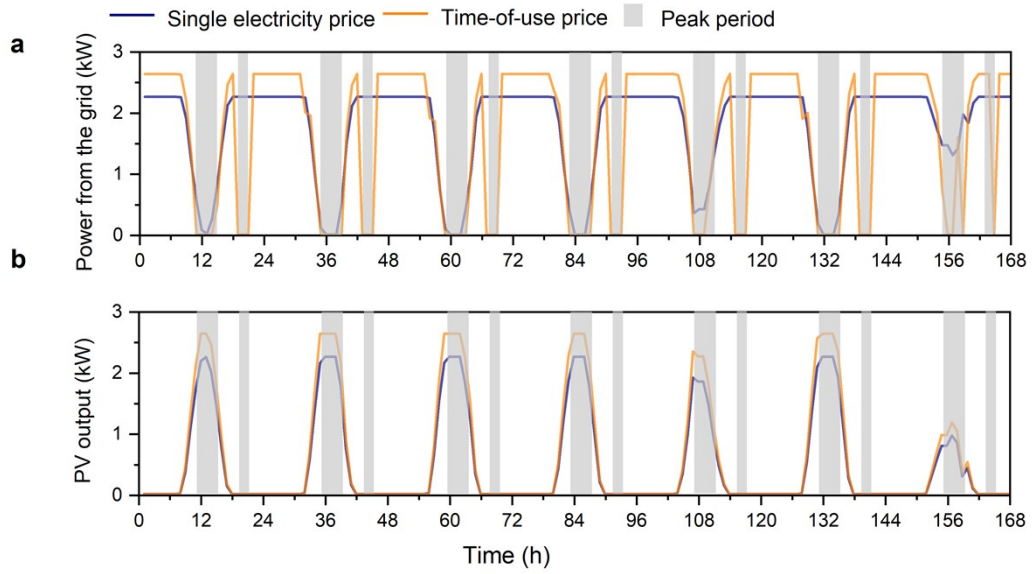

**Figure S3.** Power purchased from the grid and PV output in Beijing within a week. The capacity factor in single electricity price and time-of-use price scenarios is 1 and 0.86, respectively.

**S4 Annual bills paid by the provincial governments under the three subsidies**

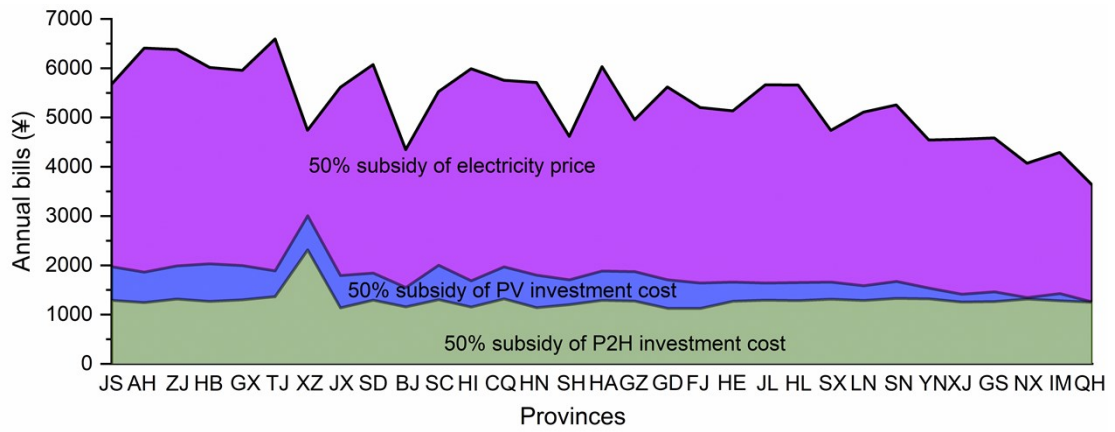

**Figure S4.** Annual bills paid by the provincial governments under the three subsidies.



## Supplementary References

1. National Bureau of Statistics of China. China Energy Statistical Yearbook 2018 (China Statistics Press, 2019). <https://www.chinayearbooks.com/tags/china-energy-statistical-yearbook>
2. Renewable Energy Statistics 2020 (International renewable energy agency); <https://www.irena.org/publications/2020/Jul/Renewable-energy-statistics-2020>
3. Guerra, O. J., Eichman, J., Kurtz, J., and Hodge, B.-M. Cost Competitiveness of Electrolytic Hydrogen. *Joule* 3, 2425–2443 (2020).
4. IEA G20 Hydrogen report: Assumptions (International Energy Agency, 2019); <https://iea.blob.core.windows.net/assets/a02a0c80-77b2-462e-a9d5-1099e0e572ce/IEA-The-Future-of-Hydrogen-Assumptions-Annex.pdf>
5. Green Hydrogen Cost Reduction: Scaling up Electrolysers to Meet the 1.5°C Climate Goal (International Renewable Energy Agency, 2020); <https://www.irena.org/publications/2020/Dec/Green-hydrogen-cost-reduction>
6. Hydrogen: Making Fossil-Free Steel (BloombergNEF, 2019); <https://about.bnef.com/>
7. The Future of Hydrogen- Seizing today’s opportunities (International Energy Agency, 2019); <https://www.iea.org/reports/the-future-of-hydrogen>
8. Hydrogen scaling up - A sustainable pathway for the global energy transition (Hydrogen Council, 2017); <https://hydrogencouncil.com/wp-content/uploads/2017/11/Hydrogen-scaling-up-Hydrogen-Council.pdf>
9. China Energy & Electricity Outlook 2019 (State Grid Energy Research Institution, 2019); <http://www.sgeri.sgcc.com.cn/html/files/2019-02/19/20190219111915944695018.pdf>
10. China Energy Development Report 2019 (China Electric Power Planning & Engineering Institute, 2020); <http://m.in-en.com/finance/html/energy-2242796.shtml>
11. World Energy Outlook 2017: China (International Energy Agency, 2017); <https://www.iea.org/reports/world-energy-outlook-2017-china>
12. Glenk, G., Reichelstein, S. Economics of converting renewable power to hydrogen. *Nat Energy* 4, 216–222 (2019).
13. Grid-connected operation of renewable energy in 2019 (National Energy Administration, 2020); [http://www.nea.gov.cn/2020-03/06/c\\_138850234.htm](http://www.nea.gov.cn/2020-03/06/c_138850234.htm)
14. Notice of Energy Production and Consumption Revolution Strategy (2016-2030) (National Development and Reform Commission, 2016); [https://www.ndrc.gov.cn/fggz/zcssfz/zcgh/201704/t20170425\\_1145761.html](https://www.ndrc.gov.cn/fggz/zcssfz/zcgh/201704/t20170425_1145761.html)
